# Supplementary material
Source: PubMed Central journal article supplement (PMC5838716)

## Supplementary Online Content

Das R, Spence G, Hogg RE, Stevenson M, Chakravathy U. Disorganization of inner retina and outer retinal morphology in diabetic macular edema.

Published online: January 11, 2018. *JAMA Ophthalmol*.

doi:10.1001/jamaophthalmol.2017.6256

**eTable 1.** Grading of SD- OCT images in DME-definitions

**eTable 2.** Relationship of visual acuity with age and systemic factors

**eTable 3.** Associations between VA and retinal morphological features of DME and DR

**eTable 4.** Correlations between VA and OCT linear variables

**eFigure 1.** SD-OCT image showing both cystoid and diffuse DME

**eFigure 2.** DME with sub retinal fluid

**eFigure 3.** Asymmetrical shape of DME

This supplementary material has been provided by the authors to give readers additional information about their work.

**e Table 1- Grading of SD- OCT images in DME-definitions**

| Grading                                     | Question               | Description                                                                                                                                                                              |
|---------------------------------------------|------------------------|------------------------------------------------------------------------------------------------------------------------------------------------------------------------------------------|
| Presence of IRF                             | Yes-Cystoid or diffuse | Cystoid- accumulation of intra retinal fluid that has a cystoid appearance, which causes increased retinal thickness. (e Figure 1)                                                       |
|                                             | No<br>CG               | Diffuse- accumulation of intraretinal fluid causing increased retinal thickness that does not have a focal appearance within the scans in the macular region (e Figure 1).               |
| If cystoid, describe the cyst<br><br>Septae | Present<br><br>Absent  | The presence of a linear hyperreflective line dividing the cyst as septae within the cysts. Example of large cyst with no septae is shown in e Figure 1.                                 |
| Presence of subretinal fluid (SRF)          | Yes/No                 | A homogeneous optically empty space situated between the neurosensory retina and the RPE (e Figure 2).                                                                                   |
| Symmetry of IRF around the fovea            | Symmetrical            | We evaluated this in general terms. We visually amalgamated The intra and/or sub retinal fluid was visually judged on whether this was (roughly) symmetrical on both sides of the fovea. |
|                                             | Asymmetrical           | We evaluated this in general terms. The intra and/or sub retinal fluid were visually judged on whether this was (roughly)                                                                |

|                       |           |                                                                                                                                                                                                                                                                                 |
|-----------------------|-----------|---------------------------------------------------------------------------------------------------------------------------------------------------------------------------------------------------------------------------------------------------------------------------------|
|                       |           | asymmetrical on both sides of the fovea. (e Figure 3). □                                                                                                                                                                                                                        |
| Shape of the DME      | Dome      | Rounded shape (e Figure 1)                                                                                                                                                                                                                                                      |
|                       | Fusiform  | Wide in the middle and tapering at both ends                                                                                                                                                                                                                                    |
| Hyper reflective dots | Yes/No    | Lesions of equal or higher reflectivity than the RPE band, located within the neurosensory retina and within SRD, often discrete and well-circumscribed, but sometimes seen attached to elevated RPE overlying drusen. Dots are $\leq 30\mu\text{m}$ in the vertical direction. |
| Hyper reflective foci | Yes/No    | Lesions of equal or higher reflectivity than the retinal pigment epithelium (RPE) band, located within the neurosensory retina and within SRD, not so well circumscribed but sometimes seen attached to elevated RPE. Foci are $>30\mu\text{m}$ in the vertical direction.      |
| ELM and EZ            | Intact    | All hyper-reflectivity bands are visible and morphologically intact in the foveal scans lying within 500 $\mu\text{m}$ of the foveal depression in all directions                                                                                                               |
|                       | Disrupted | If there is disruption in the continuity of the hyper reflective layers. The extent of disruption of ELM and EZ over a region of 1000 $\mu\text{m}$ surrounding the center of the fovea was recorded (Figure 1).                                                                |

|                                       |        |                                                                                                                                                                                                                                                                                                                               |
|---------------------------------------|--------|-------------------------------------------------------------------------------------------------------------------------------------------------------------------------------------------------------------------------------------------------------------------------------------------------------------------------------|
| DRIL                                  | Yes/No | The horizontal extent in microns for which any boundaries between the ganglion cell–inner plexiform layer complex, inner nuclear layer, and outer plexiform layer could not be identified. The horizontal extent of DRIL in each of 7 B-scans was measured and added to derive a global DRIL measure for each eye (Figure 2). |
| Vitreous attachment                   | Yes/No | Attached at the macula without traction                                                                                                                                                                                                                                                                                       |
|                                       |        | Attached at macula with traction                                                                                                                                                                                                                                                                                              |
|                                       |        | Definitely detached at macula (can see vitreous face but not attached)                                                                                                                                                                                                                                                        |
|                                       |        | Not known (either fully detached beyond the range of scan or fully attached and therefore not visible)                                                                                                                                                                                                                        |
|                                       |        | CG                                                                                                                                                                                                                                                                                                                            |
| Other pathology                       | Yes    | Macular hole                                                                                                                                                                                                                                                                                                                  |
|                                       | No/CG  | Epiretinal membrane (Figure 2)                                                                                                                                                                                                                                                                                                |
| Thickness at the fovea/presumed fovea |        | We selected one scan from the image set, which best shows, the foveal depression and measured all features present on this scan. The Retinal thickness at fovea (RTF) was measured from the Internal Limiting Membrane (ILM) to the inner edge of the interdigitation zone (IZ). The height of the                            |

|                                 |  |                                                                                                                                                                                                                                                                                               |
|---------------------------------|--|-----------------------------------------------------------------------------------------------------------------------------------------------------------------------------------------------------------------------------------------------------------------------------------------------|
|                                 |  | sub retinal fluid (SRF) if present was recorded. Choroidal thickness at the fovea and 1000 microns temporal and nasal to fovea was measured. The choroid was measured from the bottom of the RPE/Bruch's complex until the signal falls off to background, or to the choroid/sclera junction. |
| Maximum retinal thickness (MRT) |  | We measured this if the site of MRT was not at the fovea and we recorded the maximum observed thickness of a particular layer in any of the OCT scans from the ILM to the inner edge of the IZ.                                                                                               |

Abbreviations- SD-OCT, spectral domain optical coherence tomography; DME, diabetic macular edema; IRF, intraretinal fluid; CG, cannot grade; SRF, subretinal fluid; ELM, external limiting membrane; EZ, ellipsoid zone; DRIL, disorganization of inner retinal layers; RTF, retinal thickness fovea; MRT, maximum retinal thickness; CT, choroidal thickness.

**e Table 2- Relationship of visual acuity with age and systemic factors**

| Factors                                               | mean, +/-SD, years                 | $\beta^a$     | P value <sup>b</sup> |
|-------------------------------------------------------|------------------------------------|---------------|----------------------|
| Age                                                   | 63 +/-11                           | -0.15         | .16                  |
| Duration of DM                                        | 16.74 +/-10.84                     | 0.08          | .5                   |
|                                                       | <b>VA (letters)<br/>mean +/-SD</b> | <b>ANOVA</b>  |                      |
| Hypertension n (%)<br>Yes 51(63.7)<br>No 29( 36.3)    | 54.6+/-15.4<br>56.9+/-13.3         | F=0.43(1,78)  | .5                   |
| Hyperlipidemia n (%)<br>Yes 54 (67.5)<br>No 26( 32.5) | 55.9+/-14.55<br>54.5+/-15.2        | F=0.15(1,78)  | .4                   |
| Smoking n (%)<br>Yes 33(41.3)<br>No 47( 67.5)         | 53.8+/-16.05<br>56.6+/-13.7        | F=0.72 (1,78) | .4                   |

Abbreviations- VA, visual acuity; DM, Diabetes mellitus

<sup>a</sup> Results are reported from Linear regression

<sup>b</sup>  $P < .05$

**e Table 3- Associations between VA and retinal morphological features of DME and DR**

| Variables                      | n (%)     | VA mean +/-SD (letters) | ANOVA, P value                 |                                     |
|--------------------------------|-----------|-------------------------|--------------------------------|-------------------------------------|
| <b>Type of DME</b>             |           |                         |                                |                                     |
| Intraretinal fluid (IRF)       | 72(70.6)  | 55.2+/-14.9             | F=0.03(1,99), .8               |                                     |
| IRF and subretinal fluid (SRF) | 29(28.4)  | 55.8 +/-14.4            |                                |                                     |
| <b>Type of IRF</b>             |           |                         |                                |                                     |
| Diffuse                        | 21(20.6)  | 55.2 +/-17              | F=0.004(1,98), .9              |                                     |
| Cystoid                        | 26 (25.5) | 55.6 +/-13.4            |                                |                                     |
| Mixed                          | 54(52.9)  | 55.3 +/-14.6            |                                |                                     |
| <b>Symmetry of IRF</b>         |           |                         |                                |                                     |
| Symmetrical                    | 69 (67.6) | 54.7 +/-14.4            | F=0.49(1,99), .4               |                                     |
| Asymmetrical                   | 32 (31.4) | 56.9 +/-15.3            |                                |                                     |
| <b>Shape of DME</b>            |           |                         | F=4.8(1,99), .03 <sup>a</sup>  |                                     |
| Dome                           | 51(50)    | 53.7 +/-13.4            |                                |                                     |
| Fusiform                       | 32(31.4)  | 55.9 +/-14.3            |                                |                                     |
| <b>Cysts in inner retina</b>   | Yes       | 81(79.4)                | 55.2 +/-14.2                   | F=0.07(1,99), .7                    |
|                                | No        | 20(19.6)                | 57.2 +/-16.6                   |                                     |
| <b>Septae in cysts</b>         | Yes       | 59(57.8)                | 57.15 +/-13.5                  | F=4.2(1,79), .04 <sup>a</sup>       |
|                                | No        | 22(21.6)                | 49.95 +/-15                    |                                     |
| <b>DRIL</b>                    | Yes       | 23 (22.5)               | 46.1+/-14.9                    | F=13.2 (1, 99), <0.001 <sup>b</sup> |
|                                | No        | 78(76.5)                | 58.1 +/-13.5                   |                                     |
| <b>ELM disrupted</b>           | Yes       | 38(37.3)                | 46.1 +/-14.8                   | F= 13.2 (1,99), <. 001 <sup>a</sup> |
|                                | No        | 63(61.8)                | 61 +/-11.5                     |                                     |
| <b>EZ disrupted</b>            | Yes       | 42(41.2)                | 48.26 +/-14.8                  | F=20.09 (1,99), <.001 <sup>a</sup>  |
|                                | No        | 59(57.8)                | 60.63 +/-12.4                  |                                     |
| <b>DR severity stage</b>       |           |                         |                                |                                     |
| Mild NPDR                      | 53(52)    | 57.96 +/-14.09          | F=3.4 (1,99), .03 <sup>a</sup> |                                     |
| Moderate NPDR                  | 37(36.3)  | 55 +/-14.6              |                                |                                     |
| PDR                            | 10(9.8)   | 45.1+/-14.2             |                                |                                     |

Abbreviations- DME, diabetic macular edema; DR, diabetic retinopathy; IRF, intra retinal fluid; DRIL, disorganization of inner retinal layers; ELM, external limiting membrane; EZ, ellipsoid zone; NPDR, non proliferative DR; PDR, proliferative DR

<sup>a</sup> P<.05

**e Table 4- Correlations between VA and OCT linear variables**

| <b>Variable</b>                    | <b>VA</b><br>Pearson's correlation,<br>p-value | <b>p-value</b> |
|------------------------------------|------------------------------------------------|----------------|
| RTF per 100 µm                     | -0.27**                                        | <b>0.005</b>   |
| MRT per 100 µm                     | -0.4*                                          | <b>0.01</b>    |
| Average global DRIL per 100 µm     | -0.53**                                        | <b>0.009</b>   |
| ELM disruption at fovea per 100 µm | -0.41*                                         | <b>0.01</b>    |
| EZ disruption at fovea per 100 µm  | -0.44**                                        | <b>0.003</b>   |
| CT at fovea per 100 µm             | -0.11                                          | 0.2            |
| CT temporal to fovea per 100 µm    | -0.1                                           | 0.2            |
| CT nasal to fovea per 100 µm       | -0.4                                           | 0.1            |

Abbreviations- VA, visual acuity; OCT, optical coherence tomography; RTF, retinal thickness at fovea; MRT, maximum retinal thickness; DRIL, disorganization of inner retinal layers; ELM, external limiting membrane; EZ, ellipsoid zone; CT, choroidal thickness \*\* significant at the level of 0.01, \*significant at level of 0.05



**e Figure 1- SD-OCT image showing both cystoid and diffuse DME**

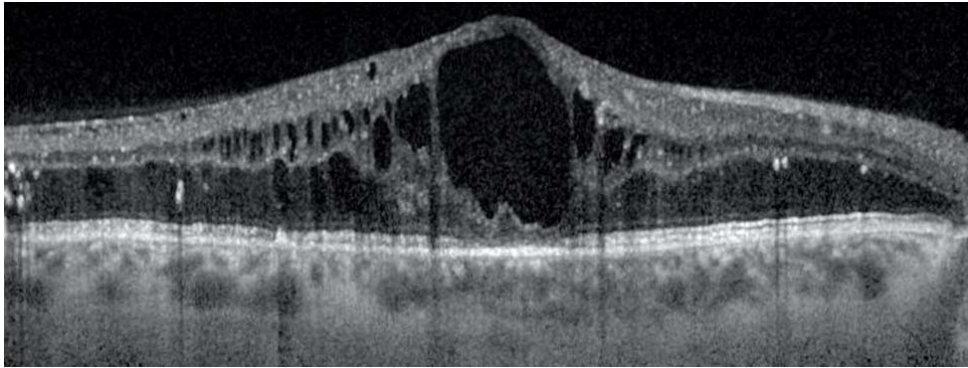

**e Figure 2- DME with sub retinal fluid**

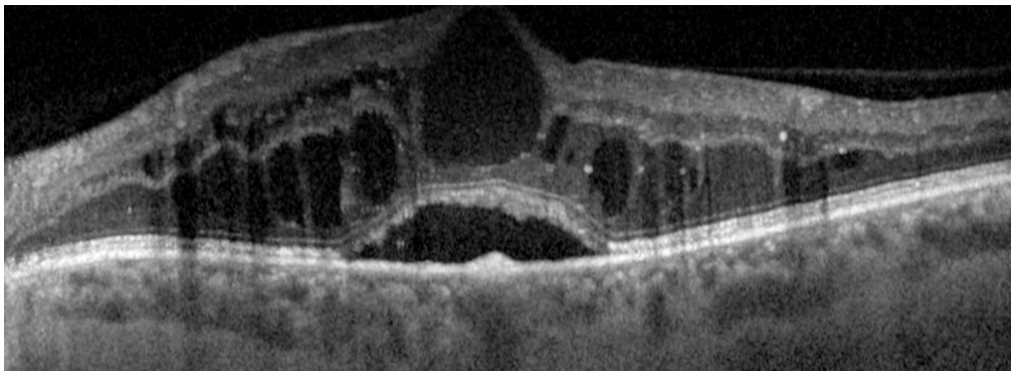

**e Figure 3- Asymmetrical shape of DME**

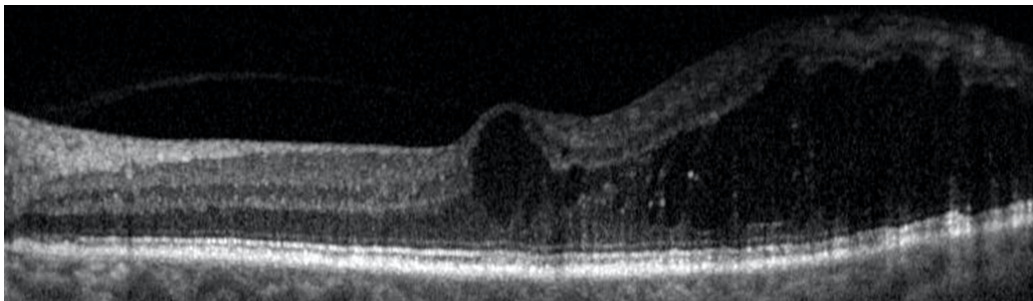

Supplement: jamaophthalmol-136-202-s001.pdf [file jamaophthalmol-136-202-s001.pdf]
